# Supplementary material
Source: PubMed Central journal article supplement (PMC3548986)

Supplementary Figure S1

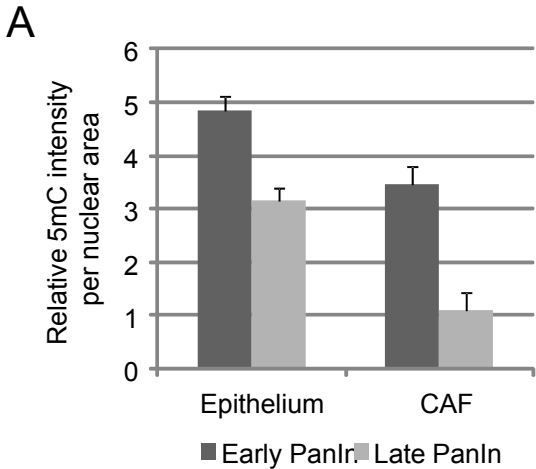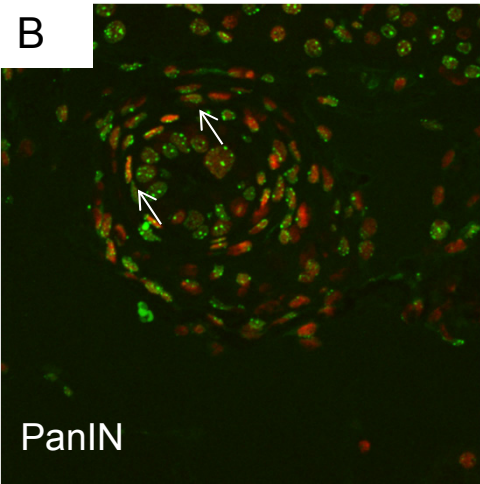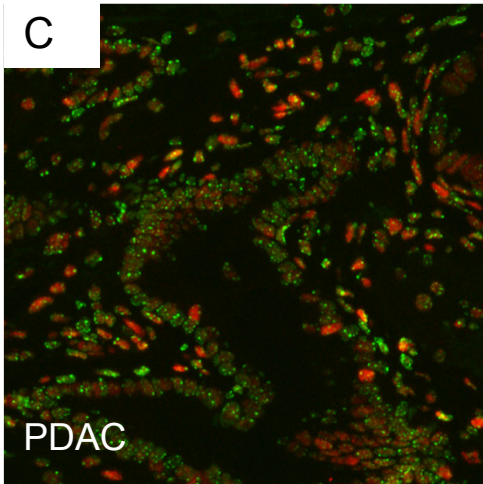

Supplementary Figure S2

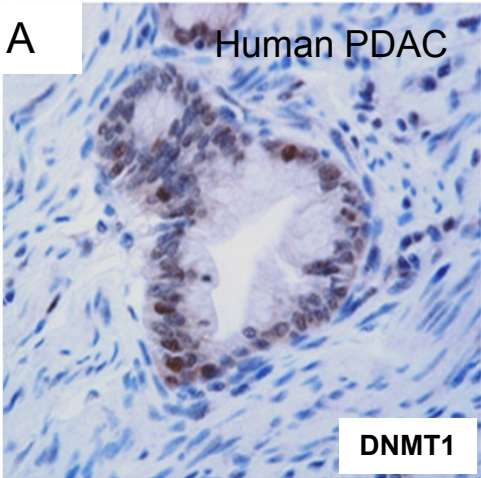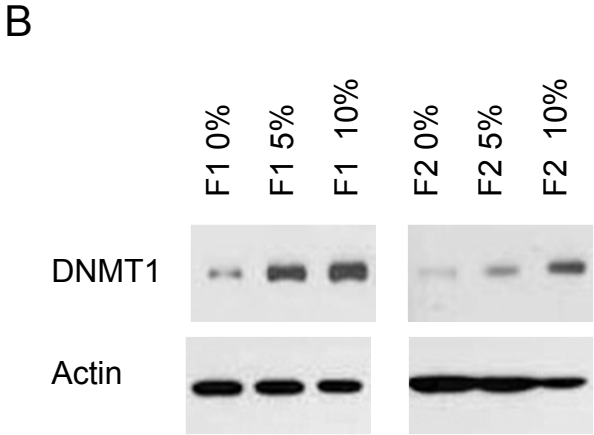

Supplementary Figure S3

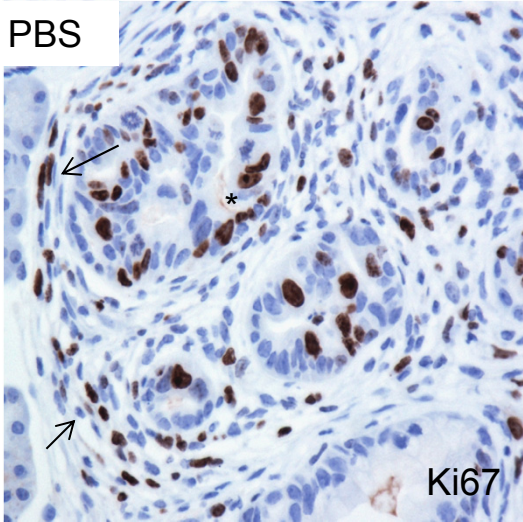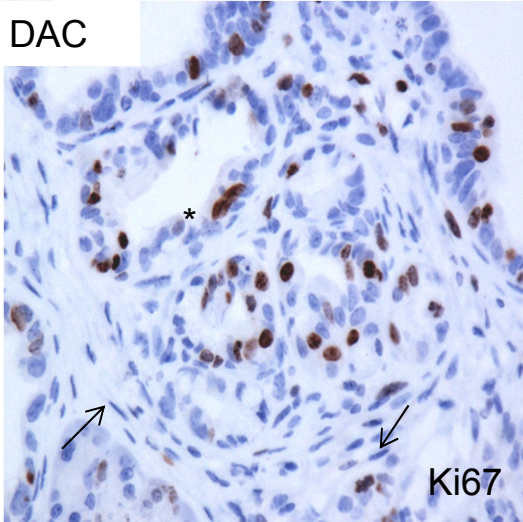

# Supplementary Figure S4

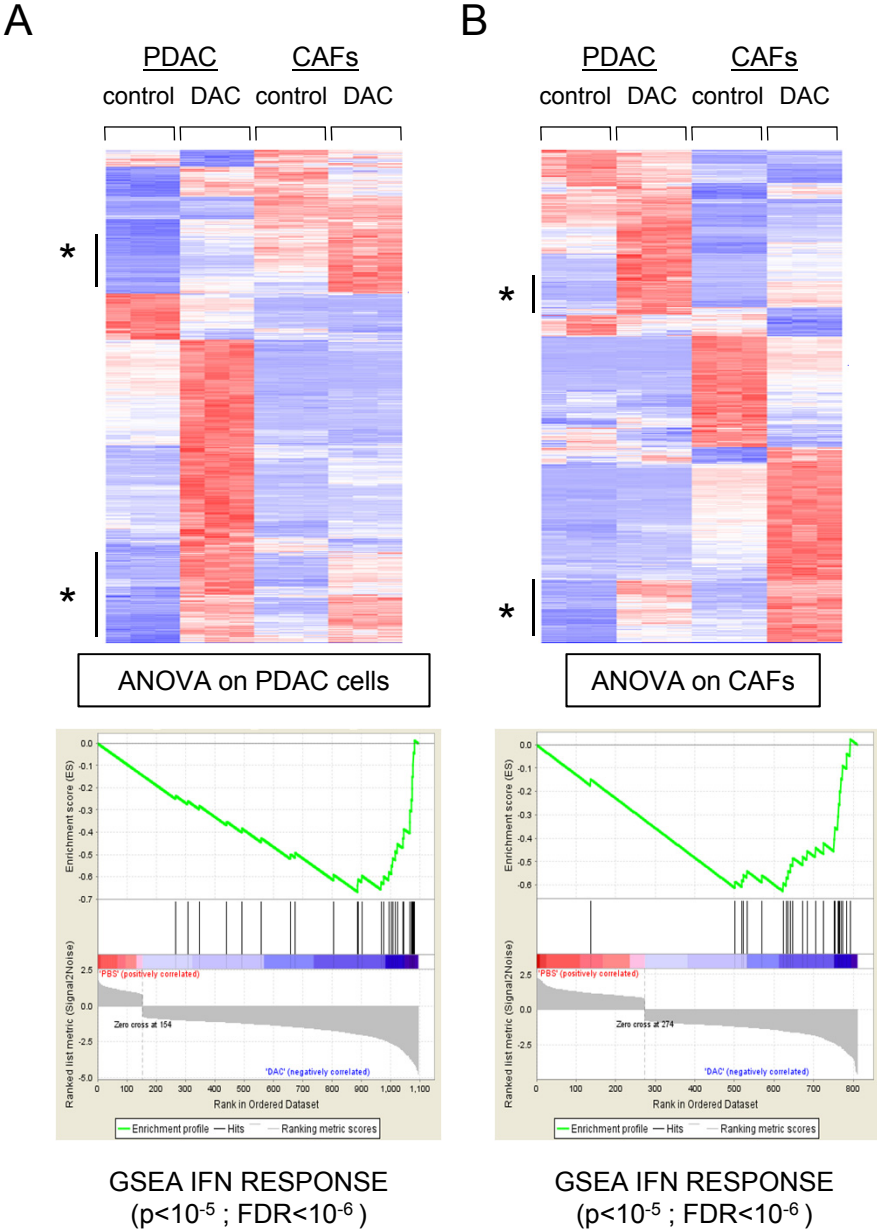

Supplementary Figure S5

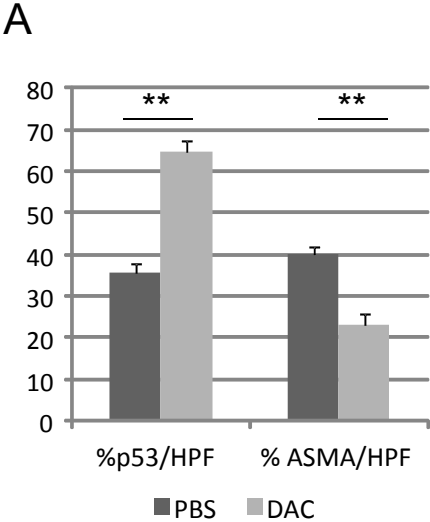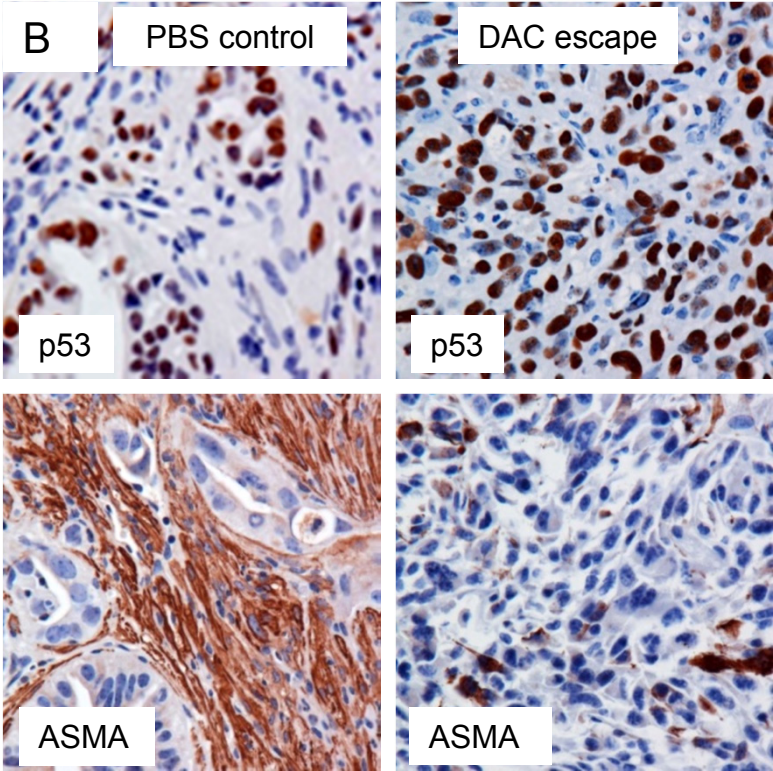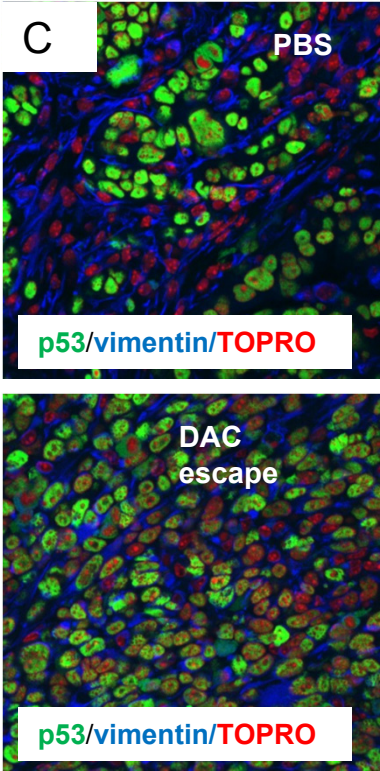

Supplement: NIHMS424707-supplement-2.pdf [file NIHMS424707-supplement-2.pdf]
